# Supplementary material for: Interleukin-37 modulates microglial phenotype and inhibits inflammatory response via the MyD88/NF-κB pathway in Lipopolysaccharide-induced neuroinflammation
Source: Research Square preprint supplement (doi:10.21203/rs.3.rs-5692892/v1), 2024-12-30
Supplement: Supplementary file 1 [file edfd21aff11d9c64b1c4a4c6.docx]

*Research article*

Interleukin-37 modulates microglial phenotype and inhibits inflammatory response via the MyD88/NF-κB pathway in Lipopolysaccharide-induced neuroinflammation

**Jingwen Zhang1,2, Muhammad Abid Hayat 1,2, Yu Si 1,2, Tao Guo 1,2, Yinying Ni 1,2, Qian Wang2, Yancheng Hong 1,2, Yudie Cao 1,2, Sijia He1,2, Zijuan Weng1,2, Fengmei Li1,2，Hao Zuo3, Xin Sun3, Bo Chen 1, Jiabo Hu 1, 2,3 ***

**Author Affiliations**

1Institute of Cerebrovascular Disease, The Affiliated People's Hospital, Jiangsu University, Zhenjiang 212002, China

2Jiangsu Key Laboratory of Medical Science and Laboratory Medicine, School of Medicine, Jiangsu University, Zhenjiang 212013, China

3Zhenjiang Blood Center, Zhenjiang, Jiangsu 212013, China

*** Corresponding Author**

**Prof. Jiabo Hu***, PhD, 1 Institute of Cerebrovascular Disease, The Affiliated People's Hospital, Jiangsu University, Zhenjiang 212002, China.2 Jiangsu Key Laboratory of Medical Science and Laboratory Medicine, School of Medicine, Jiangsu University, Zhenjiang 212013, China.3 Zhenjiang Blood Center, Zhenjiang, Jiangsu 212013, China

**Email:** [hu@ujs.edu.cn](mailto:hu@ujs.edu.cn)

ORCID: <https://orcid.org/0000-0003-1974-984X>

All authors have read the manuscript and agreed to submit it in its current form for consideration for publication to the Journal Inflammation Research.


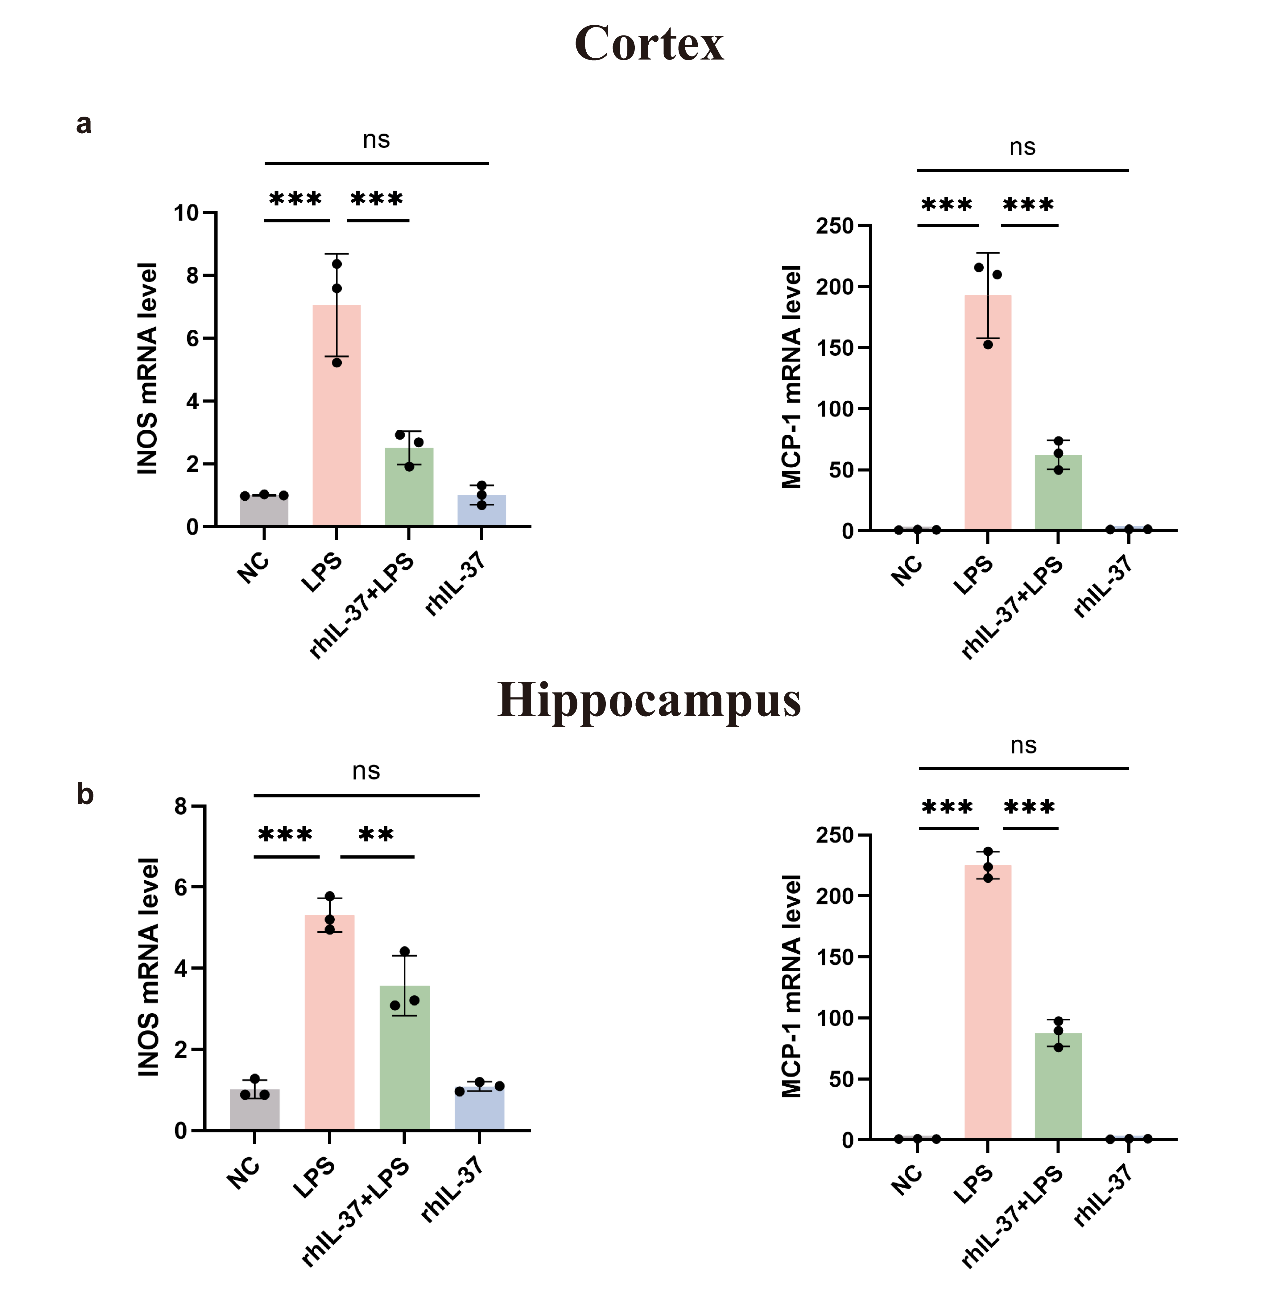


**Online Resource 1** Release of other pro-inflammatory cytokines in the cerebral cortex and hippocampus after LPS induction. (A) qRT-PCR detection of the gene expression of pro-inflammatory cytokines INOS and MCP-1 in the cerebral cortex. (B) qRT-PCR detection of the gene expression of pro-inflammatory cytokines INOS and MCP-1 in the hippocampus. (n = 3, *P < 0.05, **P < 0.01, ***P < 0.001. NS, no statistical difference)
